# Supplementary material
Source: publisher figshare collection journal article supplement (https://gsajournals.figshare.com/articles/dataset/_/6061370)
Supplement: Supplementary file 1 [file 2]

## **SUPPLEMENTARY FIGURES AND TABLES**

|                                             |                 |
|---------------------------------------------|-----------------|
| <b>Supplementary figure 1 .....</b>         | <b>p. 2</b>     |
| <b>Supplementary figure 2 .....</b>         | <b>p. 5</b>     |
| <b>Supplementary figure 3 .....</b>         | <b>p. 6</b>     |
| <b>Supplementary figures 4A-J .....</b>     | <b>pp. 7-18</b> |
| <b>Supplementary figure 5 .....</b>         | <b>p. 19</b>    |
| <b>Supplementary figure 6 .....</b>         | <b>p. 20</b>    |
| <b>Supplementary figure 7 .....</b>         | <b>p. 21</b>    |
| <b>Supplementary table 1 (legend) .....</b> | <b>p. 23</b>    |
| <b>Supplementary table 2 (legend) .....</b> | <b>p. 23</b>    |
| <b>Supplementary table 3 (legend) .....</b> | <b>p. 23</b>    |
| <b>Supplementary table 3 (legend) .....</b> | <b>p. 23</b>    |

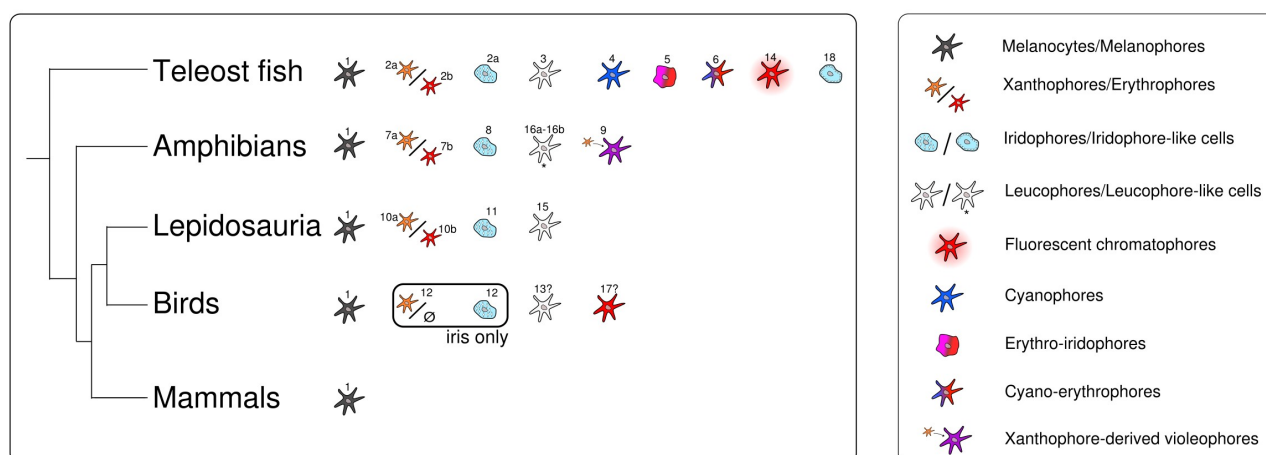

### Supplementary figure 1: An overview of the different pigment cells in the major vertebrate lineages.

Numbers indicate the corresponding literature references (see below). Apart from melanocytes (first column), cells in the same column may not correspond to homologous cell types (inter-taxa ontogenetic or genetic evidence is missing).

#### References for Supplementary figure 1:

1. Bagnara, J. T., and E. M. Hadley, 1973 *Chromatophores and Color Change. The Comparative Physiology of Animal Pigmentation*. Englewood Cliffs: Prentice-Hall
- 2a. Hawkes JW. 1974. The structure of fish skin. *Cell Tissue Res.* 149:147–158. doi: 10.1007/BF00222270.
- 2b. Chen S-C, Xiao C, Troje NF, Robertson RM, Hawryshyn CW. 2015. Functional characterisation of the chromatically antagonistic photosensitive mechanism of erythrophores in the tilapia *Oreochromis niloticus*. *J. Exp. Biol.* 218:748–756. doi: 10.1242/jeb.106831.
3. Lamoreux LM, Kelsh RN, Wakamatsu Y, Ozato K. 2005. Pigment pattern formation in the medaka embryo. *Pigment cell Res.* 18:64–73. doi: 10.1111/j.1600-0749.2005.00216.x.
4. Goda M, Fujii R. 1995. Blue Chromatophores in Two Species of Callionymid Fish. *Zoolog. Sci.* 12:811–813. doi: 10.2108/zsj.12.811.
5. Goda M et al. 2011. Integumental reddish-violet coloration owing to novel dichromatic chromatophores in the teleost fish, *Pseudochromis diadema*. *Pigment Cell Melanoma Res.* 24:614–617. doi: 10.1111/j.1755-148X.2011.00861.x.

6. Goda M, Fujiyoshi Y, Sugimoto M, Fujii R. 2013. Novel Dichromatic Chromatophores in the Integument of the Mandarin Fish *Synchiropus splendidus*. *Biol. Bull.* 224:14–17. doi: 10.1086/BBLv224n1p14.
- 7a. Vitt JL, Calwell PJ. 2013. *Herpetology, Fourth Edition: An Introductory Biology of Amphibians and Reptiles*.
- 7b. Obika M, Matsumoto J. 1968. Morphological and biochemical studies on amphibian bright-colored pigment cells and their pterinosomes. *Exp. Cell Res.* 52:646–659.
- 7b. Yasutomi M, Hama T. 1973. Structural changes of drosopterinosomes (red pigment granules) during the erythrophore differentiation of the frog, *Rana japonica*, with reference to other pigment-containing organelles. *Zeitschrift fur Zellforsch. und Mikroskopische Anat.* 137:331–343. doi: 10.1007/BF00307207.
8. MacMillan GJ. 1979. An analysis of pigment cell development in the periodic albino mutant of *Xenopus*. *J. Embryol. Exp. Morphol.* 52:165–70.
9. Nishioka M, Ueda H. 1985. Electron-microscopic observation on the dermal chromatophores of normal frogs and three kinds of color variants in *Rhacophorus schlegelii*. *Sci. Rep. Lab. Amphib. Biol., Hiroshima Univ.* 7:123–155. doi: 10.15027/357.
- 10a. Taylor JD, Hadley ME. 1970. Chromatophores and color change in the lizard, *Anolis carolinensis*. *Cell Tissue Res.* 104:282–294. <http://dx.doi.org/10.1007/BF00309737>.
- 10b. Alexander NJ, Fahrenbach WH. 1969. The dermal chromatophores of *Anolis carolinensis* (reptilia, Iguanidae). *Am. J. Anat.* 126:41–55. doi: 10.1002/aja.1001260105.
11. Morrison RL, Sherbrooke WC, Frost-Mason SK. 1996. Temperature-Sensitive , Physiologically Active Iridophores in the Lizard *Urosaurus ornatus* : An Ultrastructural Analysis of Color Change. *Am. Soc. Ichthyol. Herpetol.* 1996:804–812.
12. Oliphant LW, Hudon J, Bagnara JT. 1992. Pigment Cell Refugia in Homeotherms—The Unique Evolutionary Position of the Iris. *Pigment Cell Res.* 5:367–371. doi: 10.1111/j.1600-0749.1992.tb00564.x.
- 13? Suggested in Schartl M et al. 2016. What is a vertebrate pigment cell? *Pigment Cell Melanoma Res.* 29:8–14. doi: 10.1111/pcmr.12409.
14. Wucherer MF, Michiels NK. 2012. A Fluorescent Chromatophore Changes the Level of Fluorescence in a Reef Fish Zeil, J, editor. *PLoS One.* 7:e37913. doi: 10.1371/journal.pone.0037913.

- 15.** Smith HM. 1995. Handbook of lizards; lizards of the United States and of Canada. Comstock Publishing Associates.
- 16a.** Fukuzawa T. 2010. Unusual development of light-reflecting pigment cells in intact and regenerating tail in the periodic albino mutant of *Xenopus laevis*. *Cell Tissue Res.* 342:53–66. doi: 10.1007/s00441-010-1042-0.
- 16b.** Fukuzawa T. 2004. Unusual leucophore-like cells specifically appear in the lineage of melanophores in the periodic albino mutant of *Xenopus laevis*. *Pigment Cell Res.* 17:252–261. doi: 10.1111/j.1600-0749.2004.00135.x.
- 17?** McGraw KJ, Nogare MC. 2004. Carotenoid pigments and the selectivity of psittacofulvin-based coloration systems in parrots. *Comp. Biochem. Physiol. - B Biochem. Mol. Biol.* 138:229–233. doi: 10.1016/j.cbpc.2004.03.011.
- 18.** Goda M. 2017. Rapid integumental color changes due to novel iridophores in the chameleon sand tilefish *Hoplostethus atlanticus*. *Pigment Cell Melanoma Res.* 30:368–371. doi: 10.1111/pcmr.12581.

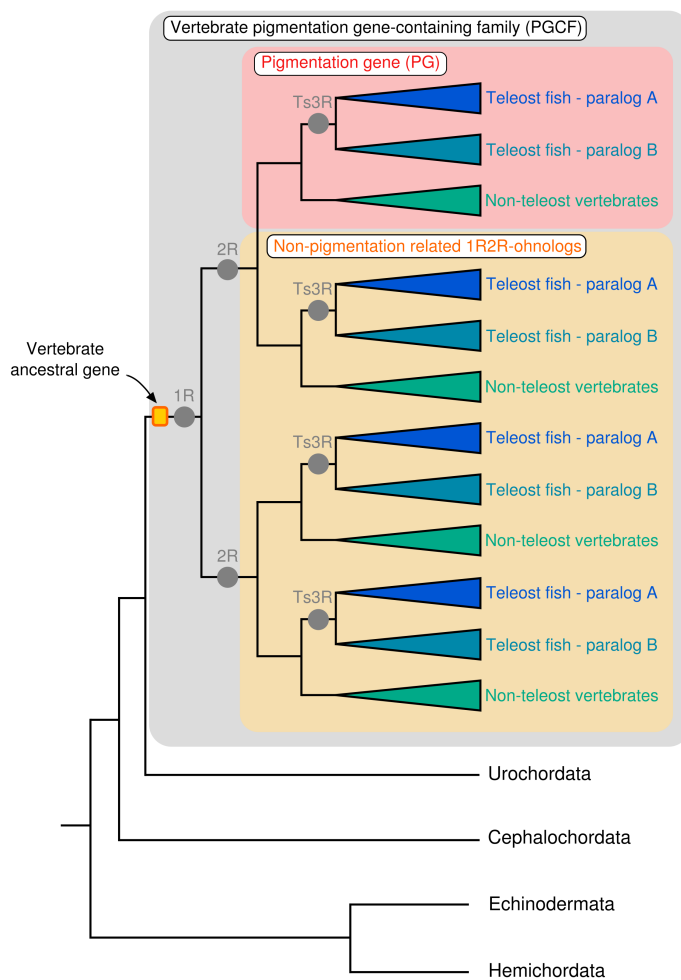

**Supplementary figure 2. Theoretical evolution of a vertebrate "pigmentation family" and definitions of terms used in this study.**

The vertebrate pre-WGD ancestral gene, theoretically present as a single copy in non-vertebrate deuterostomes, has been duplicated at the basis of vertebrate evolution and subsequently in teleost fish, leading to a total of four non-teleost vertebrate paralogs (1R/2R-ohnologs) or to eight teleost paralogs. Pigmentation genes (PGs) are defined as all vertebrate genes that are ortholog to a gene related to pigmentation in at least one vertebrate species. A pigmentation gene-containing family (PGCF) is a gene family encompassing a PG as well as all its 1R/2R-ohnologs, if any. After 1R/2R but before Ts3R, PGCFs can harbor only 1 gene (the PG) if gene losses occurred after the 1R/2R event, but most PGCFs harbor 2 genes or more. Note that 15 PGCFs harbor two paralogous PGs (see Supplementary Table 3). The 4th round of WGD occurring at the basis of the salmonid lineage is not represented here.



**Supplementary figure 4A-J (see below): Paralogy and orthology relationships for chordate pigmentation gene families.** Filled boxes correspond to gene presence. Overlapping boxes (such as for Coelacanth ALDOC) represent small scale duplications (SSDs). Boxes one above the other correspond to Ts3R-duplicates (such as for zebrafish *aldoc*: *aldoca* and *aldocb*) or to Ss4R-duplicates when there was only one Ts3R ohnolog in fish (such as for salmon *adrbk2*). Smaller boxes one next to the other correspond to Ss4R-duplicates of a Ts3R-retained gene. For instance, *aldoa* has been duplicated in fish, leading to *aldoaa* and *aldoab*; both *aldoaa* and *aldoab* were subsequently duplicated at Ss4R and all paralogs are present in trout. Empty boxes with dashed contour lines correspond to absence of gene. *P* means that the gene was annotated as a pseudogene in Ensembl.

Genes with red contours correspond to PGs (labeled with a star symbol). All genes in the same PGCF have the same fill color. For instance, *aldoc* was duplicated in fish, leading to *aldoca* and *aldocb*; only *aldocb* was subsequently kept after Ss4R, while only one copy of *aldoca* remained in salmon but was lost in trout. For multigenic PGCFs, there is only one gene copy in non-vertebrate chordates; hence, “aldo” is present in a single copy in non-vertebrate chordates and was further duplicated at 1R/2R; one ohnolog was lost leading to three extant genes.

Animal symbols are taken from PhyloPic (<http://phylopic.org/>). Divergence time between species is taken from the TimeTree website (<http://www.timetree.org/>) and from Berna et al. (2014). The exact timing of the main WGD events in the tree is not known but these events are positioned on the appropriate branches. Image credits of *L. oculatus*, *A. mexicanus*, *G. aculeatus*, *T. nigroviridis*, *X. maculatus*, *O. niloticus*: Milton Man. Image credits of *O. anatinus*, *A. carolinensis*: Sarah Werning. Image credit of *O. mykiss*: Servien (vectorized by T. Michael Keesey). Ages in chronological time scale are indicated as millions of years before present. Cmb.: Cambrian, O: Ordovician, S: Silurian, D: Devonian, Crb.: Carboniferous, P: Permian, T: Triassic, J: Jurassic, Cret.: Cretaceous, P: Paleogene, N: Neogene, Q: Quaternary. (This figure was generated with an in-house Python code available on request.)

#### References for supplementary figure 4 :

Berna L, Alvarez-Valin F. 2014. Evolutionary genomics of fast evolving tunicates. *Genome Biol. Evol.* 6:1724–1738. doi: 10.1093/gbe/evu122.

Hedges SB et al. 2006. TimeTree: a public knowledge-base of divergence times among organisms. *Bioinformatics*. 22:2971–2972. doi: 10.1093/bioinformatics/btl505.

Hedges SB, Marin J, Suleski M, Paymer M, Kumar S. 2015. Tree of life reveals clock-like speciation and diversification. *Mol. Biol. Evol.* 32:835–845. doi: 10.1093/molbev/msv037.

Kumar S, Hedges SB. 2011. Timetree2: Species divergence times on the iPhone. *Bioinformatics*. 27:2023–2024. doi: 10.1093/bioinformatics/btr315.



Supplementary figure 4A

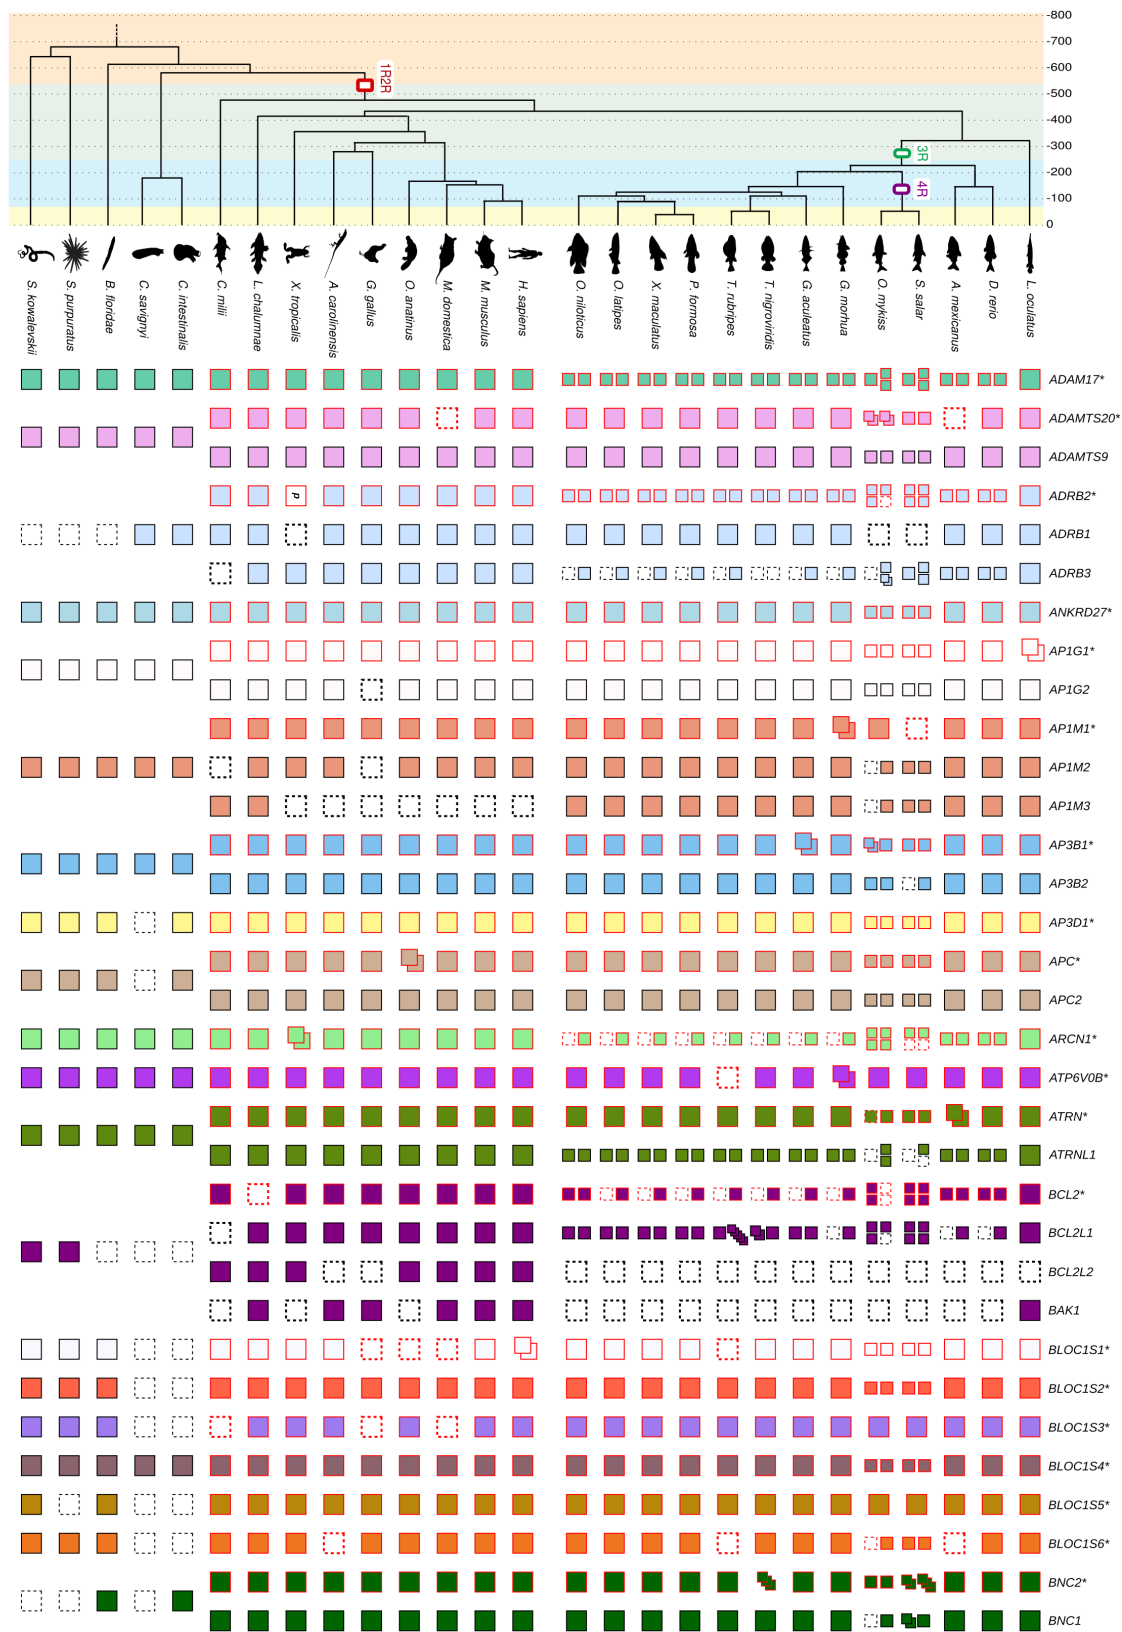

Supplementary figure 4B

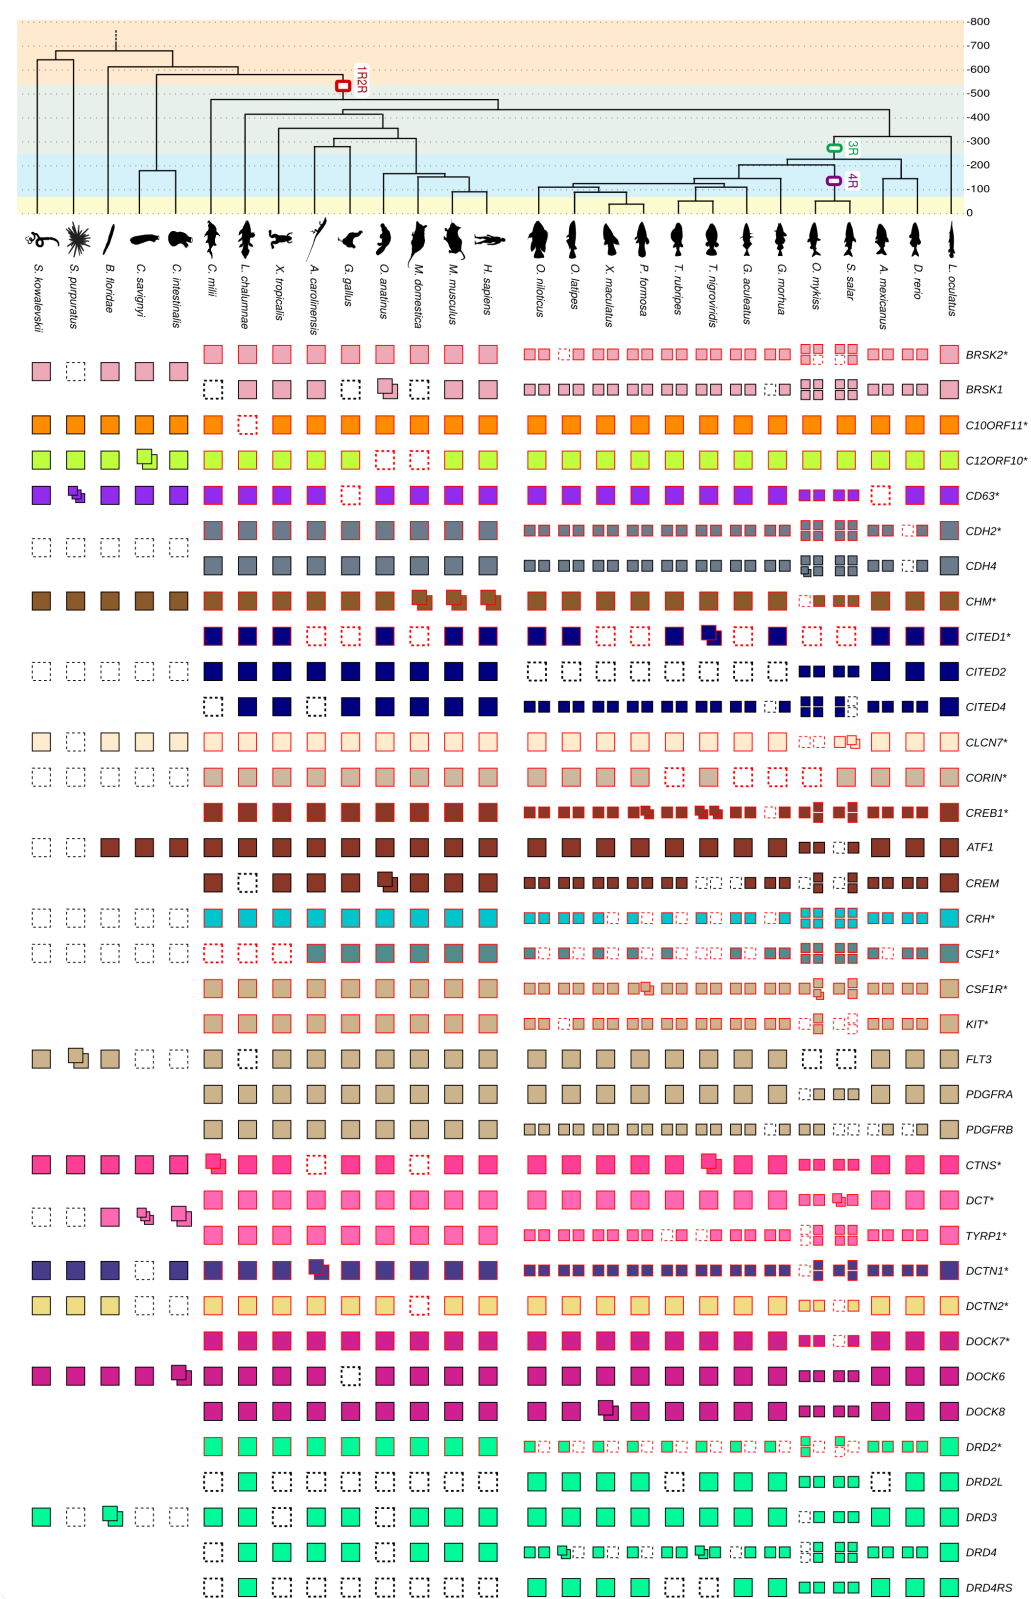

Supplementary figure 4C

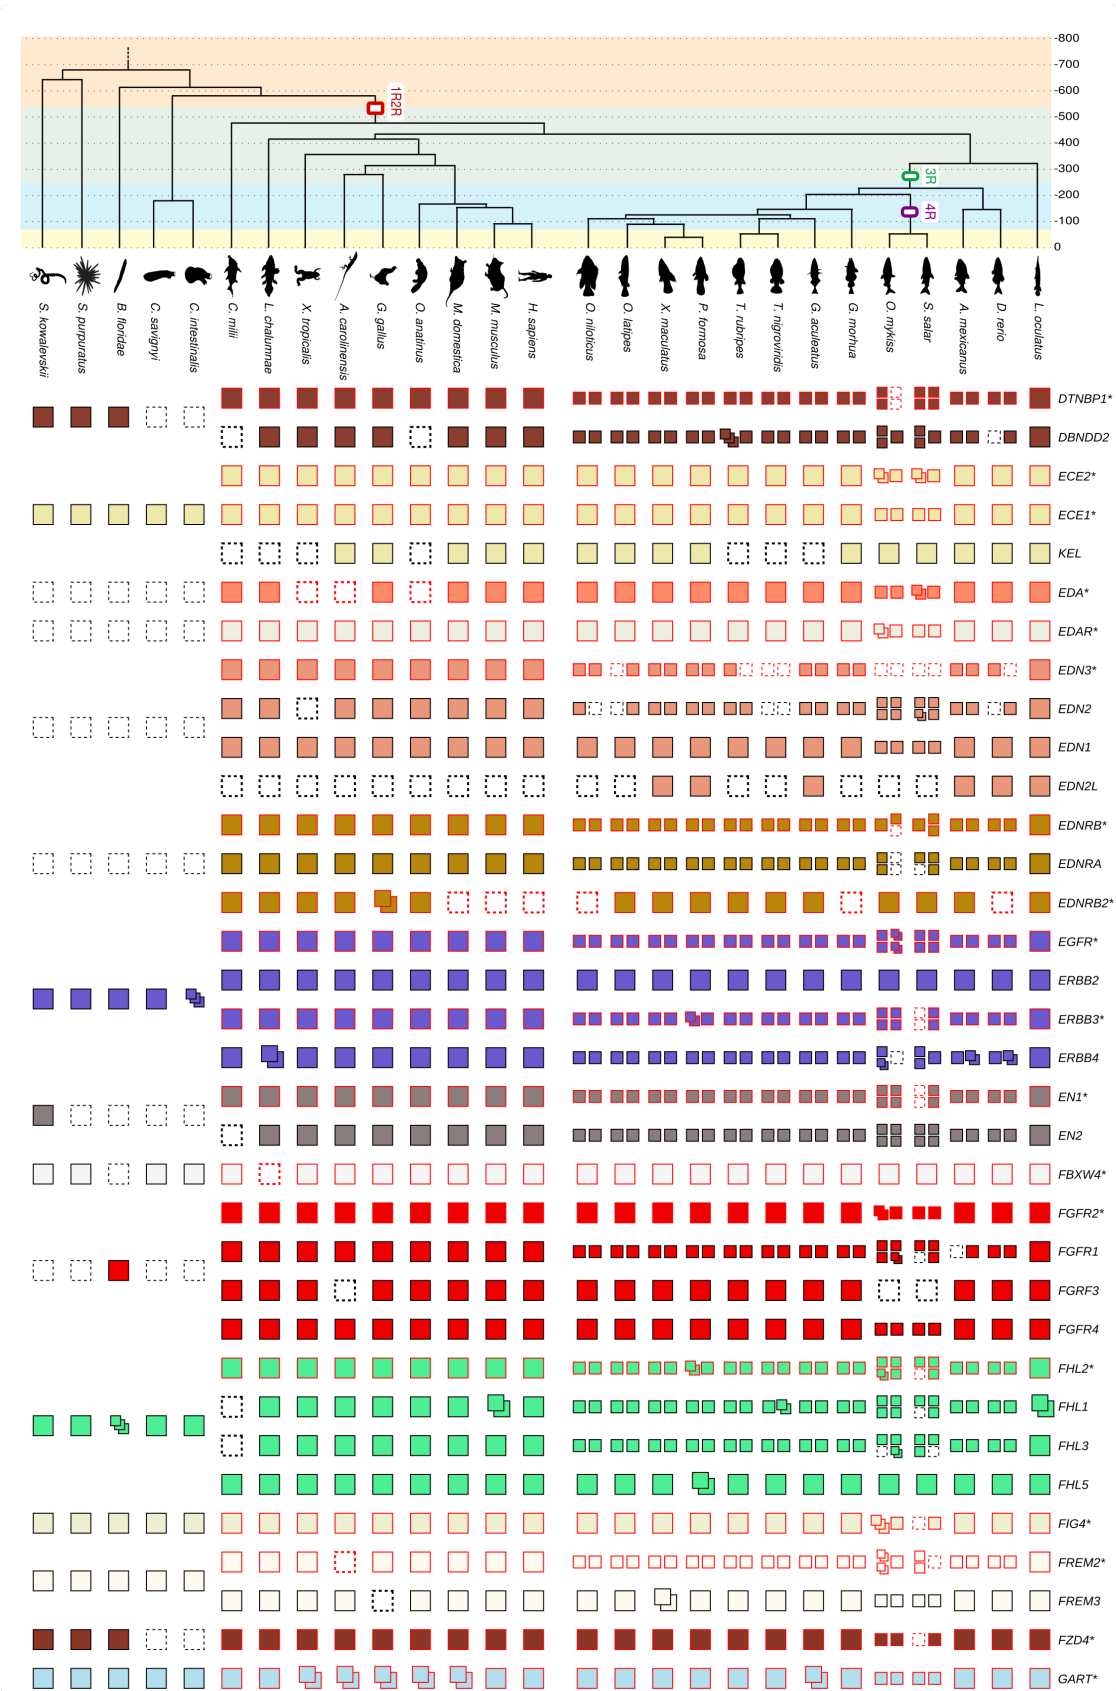

Supplementary figure 4D

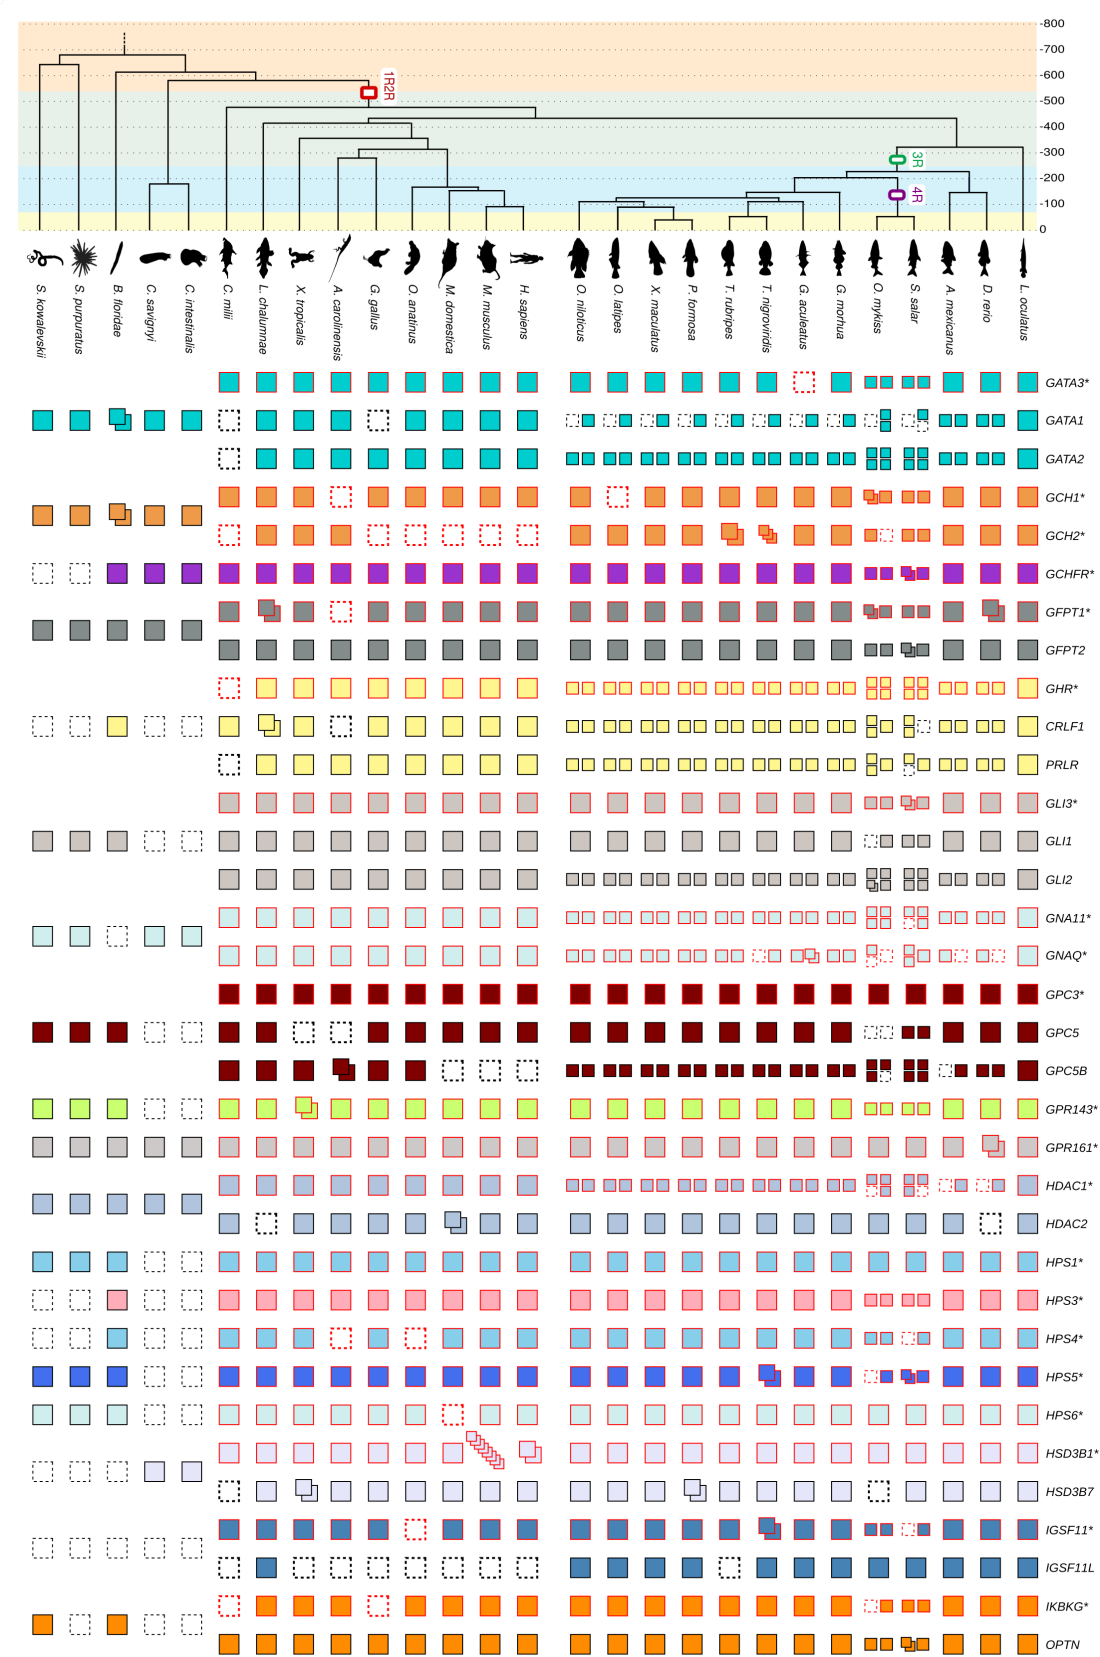

Supplementary figure 4E

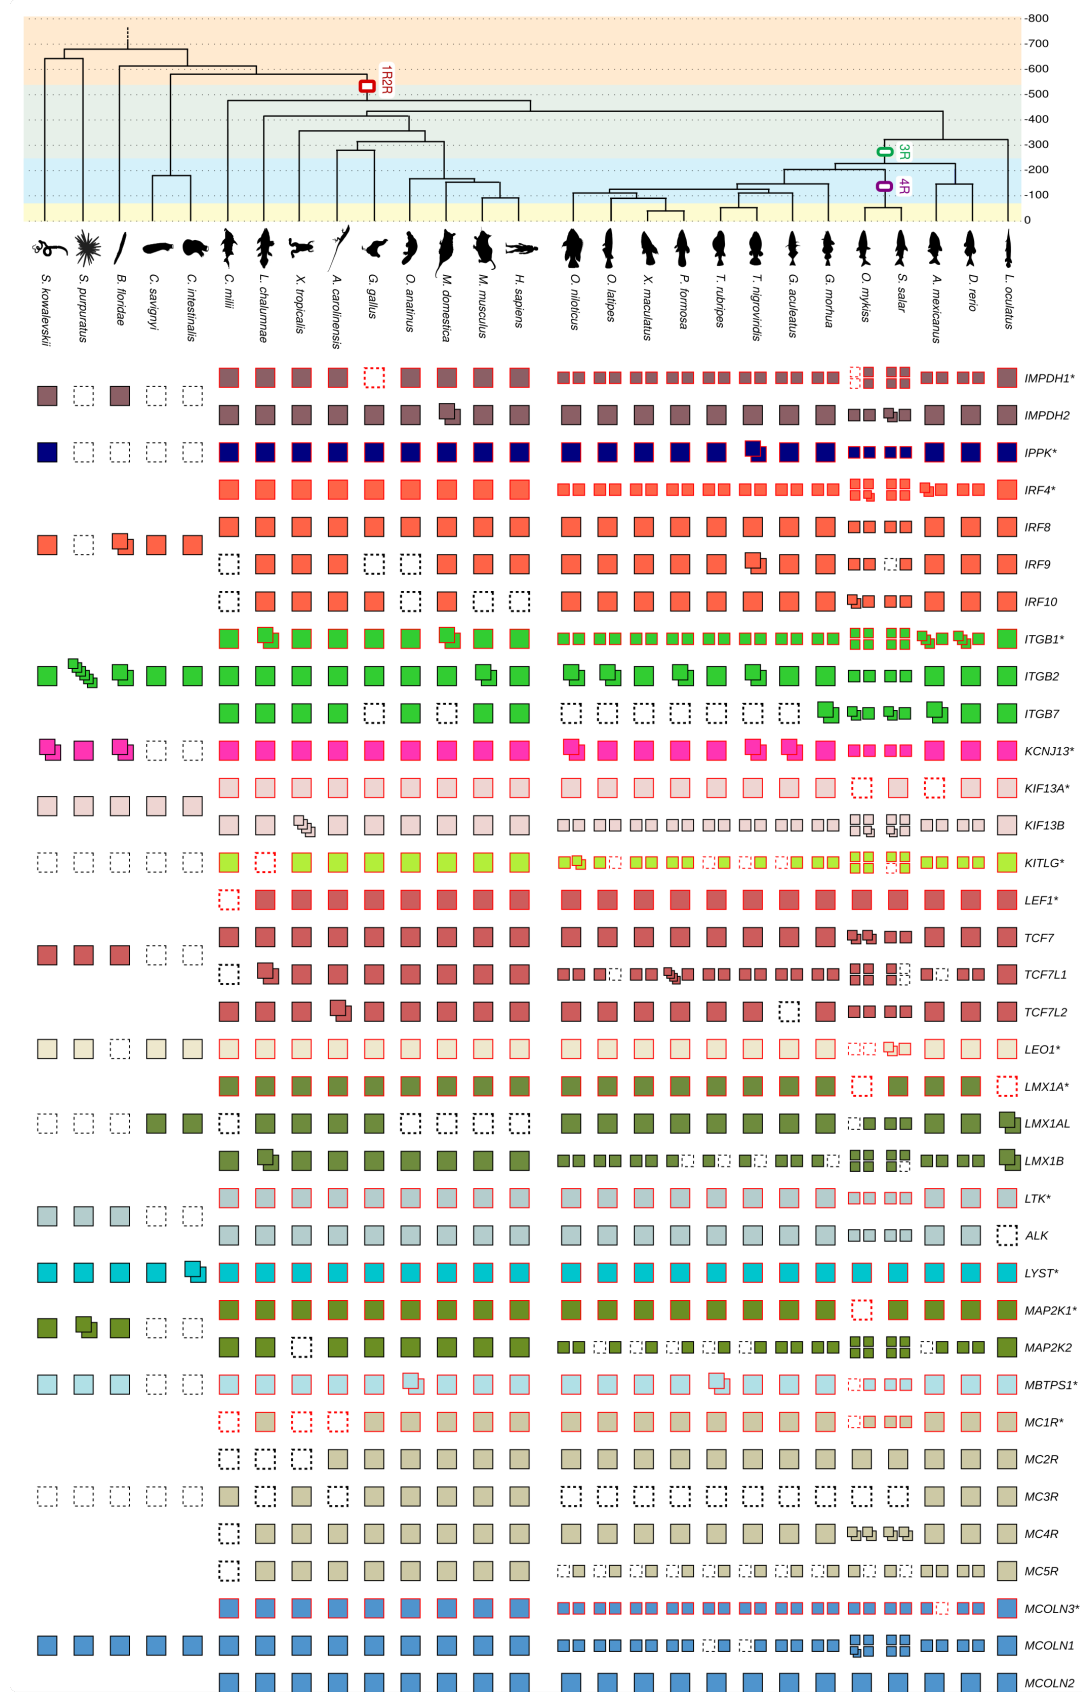

Supplementary figure 4F

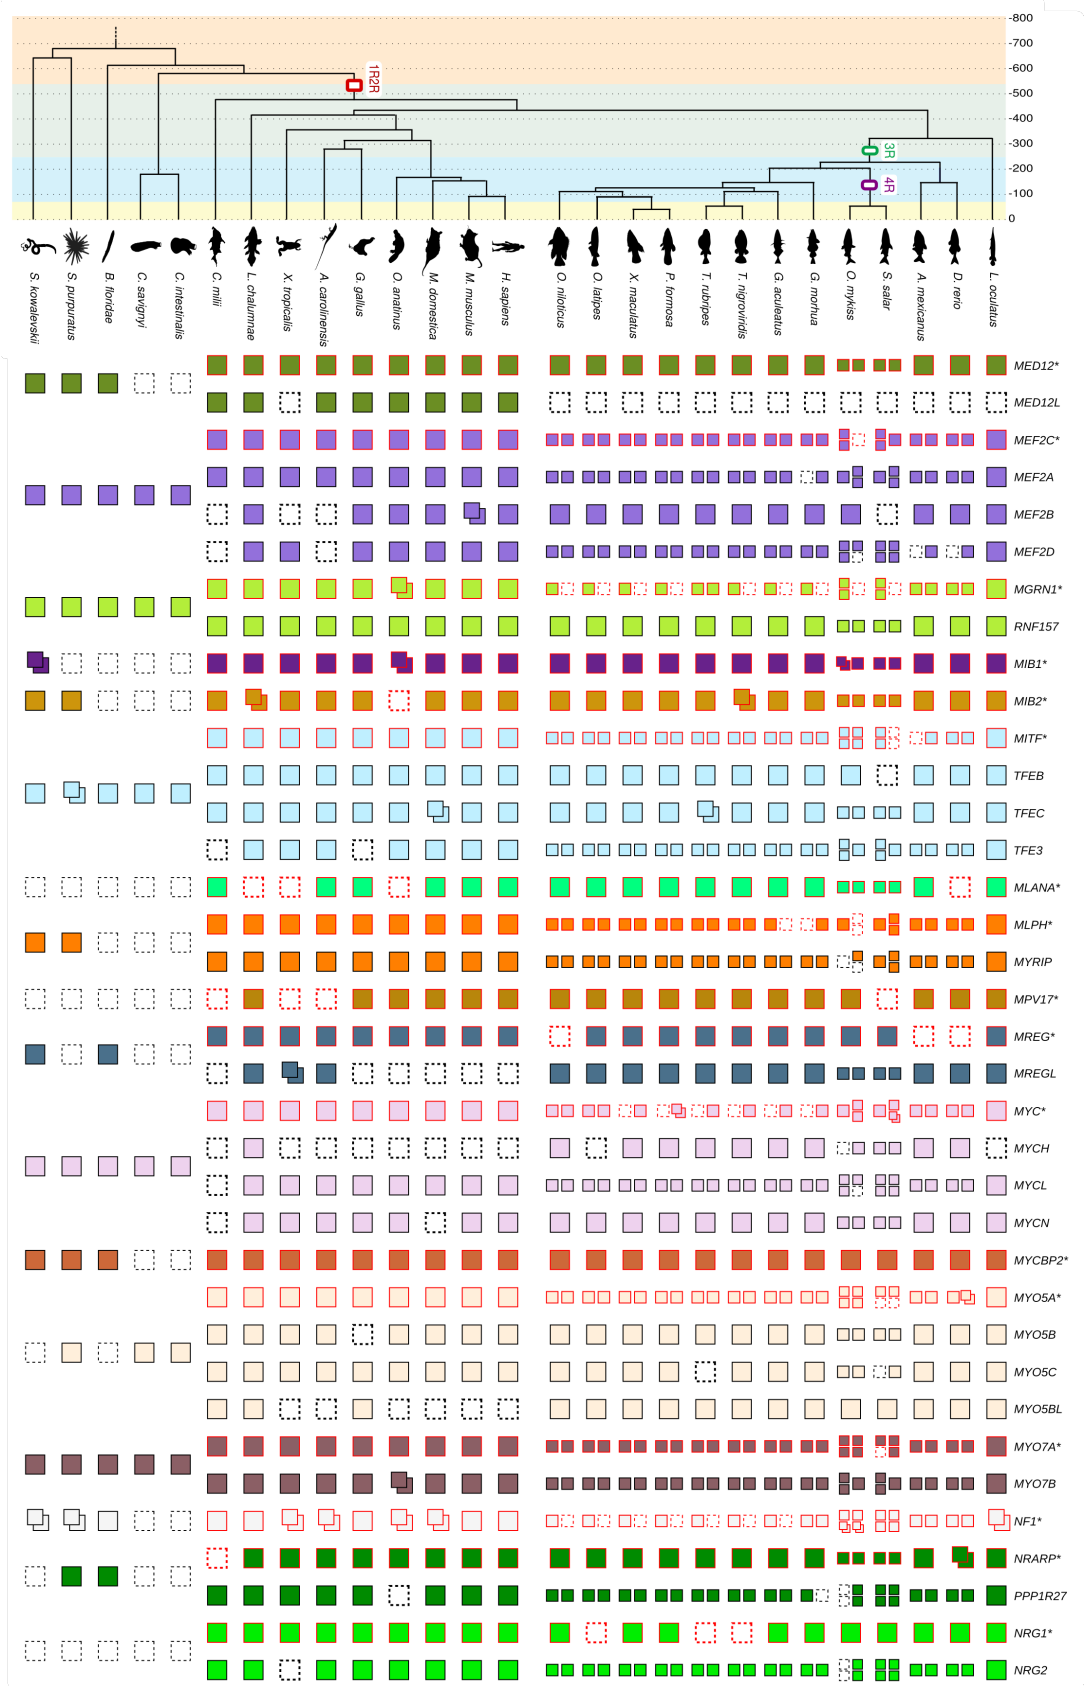

Supplementary figure 4G

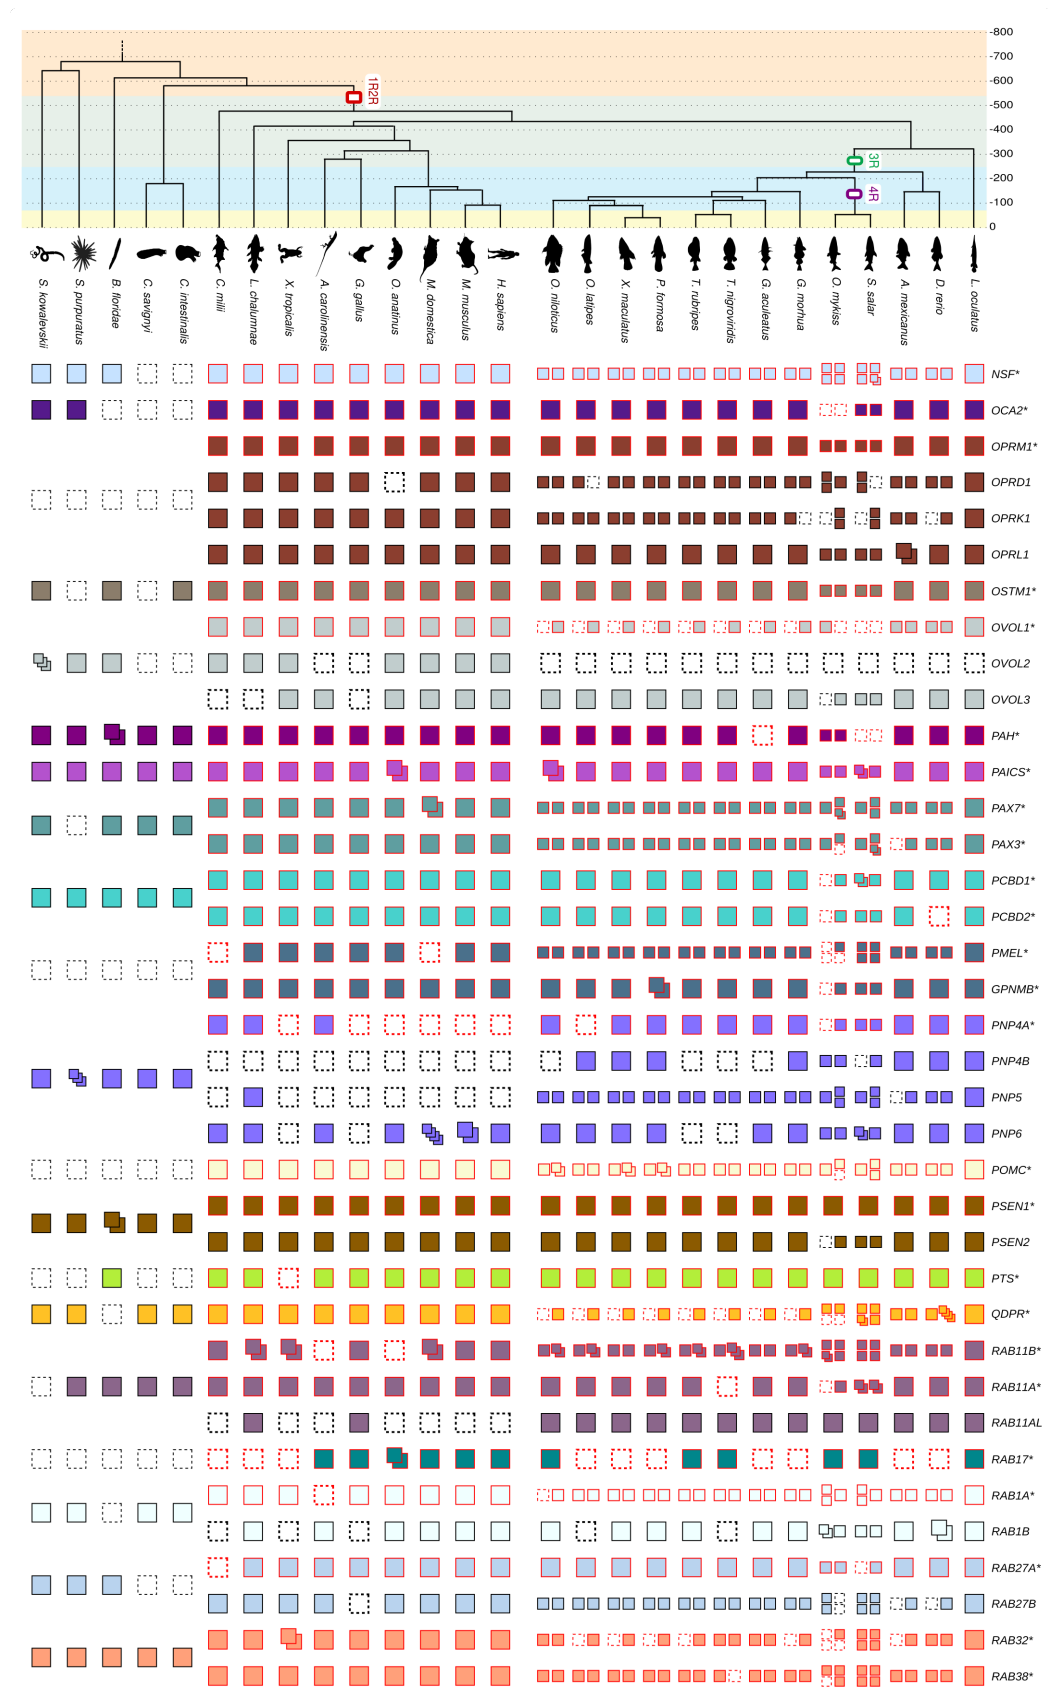

Supplementary figure 4H

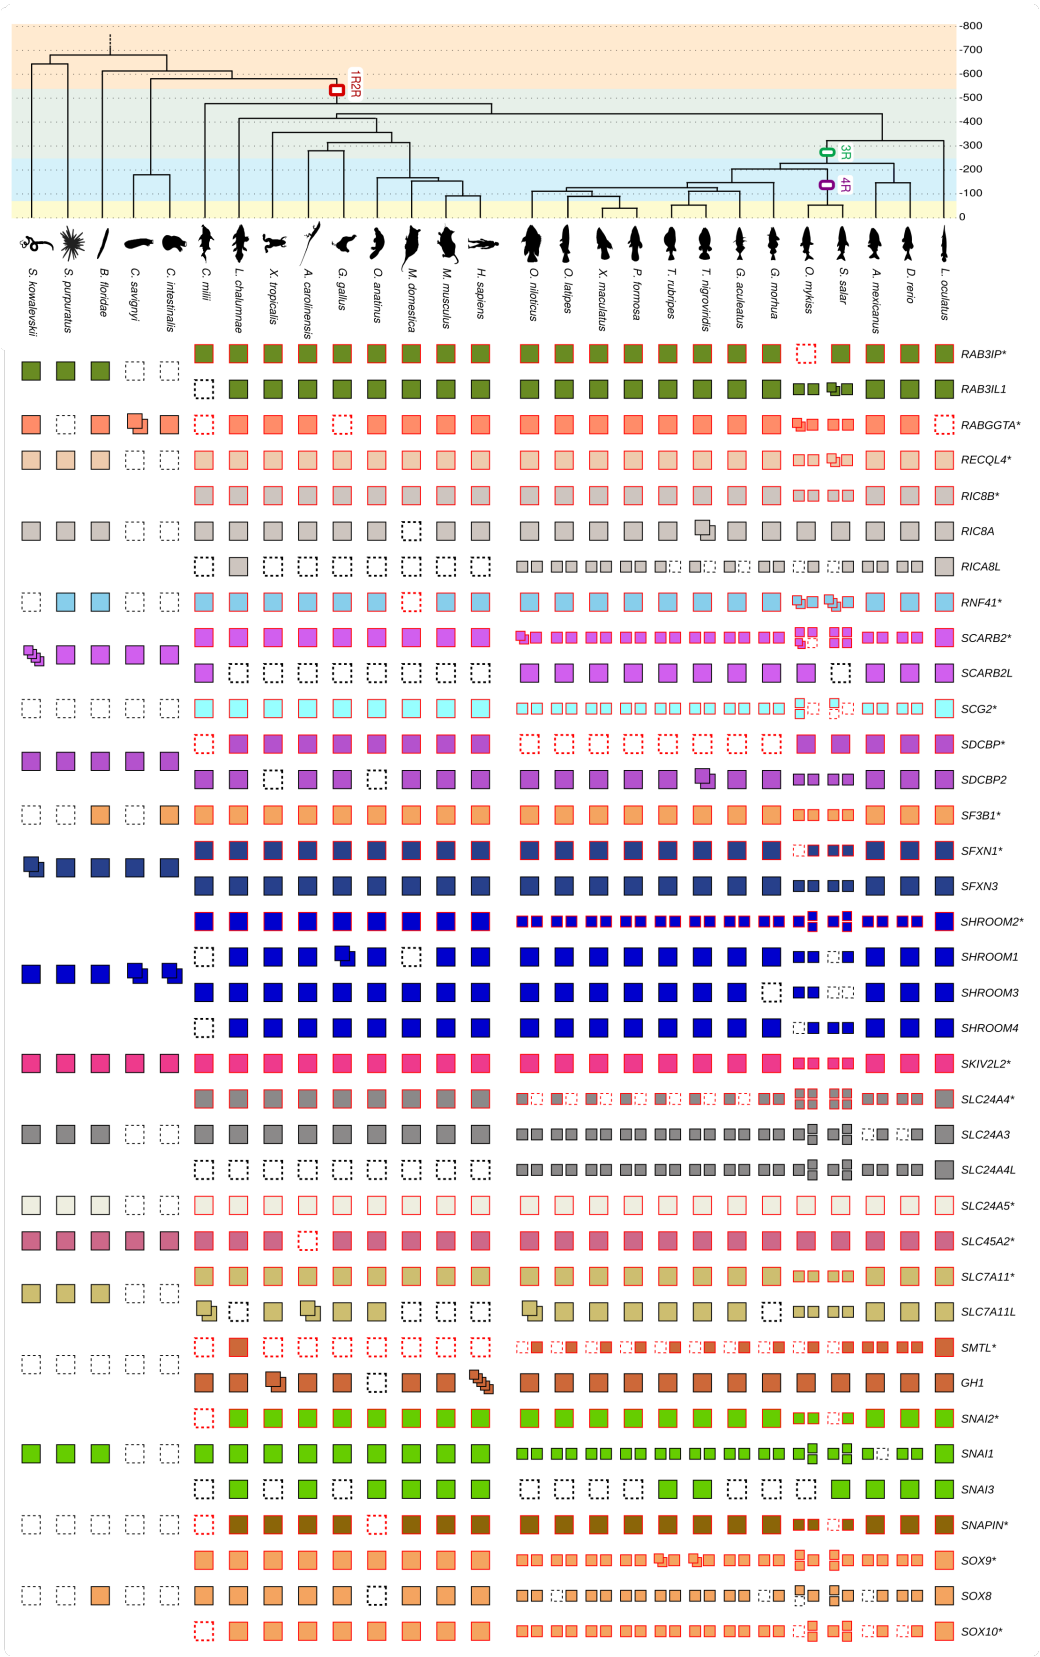



Supplementary figure 4I

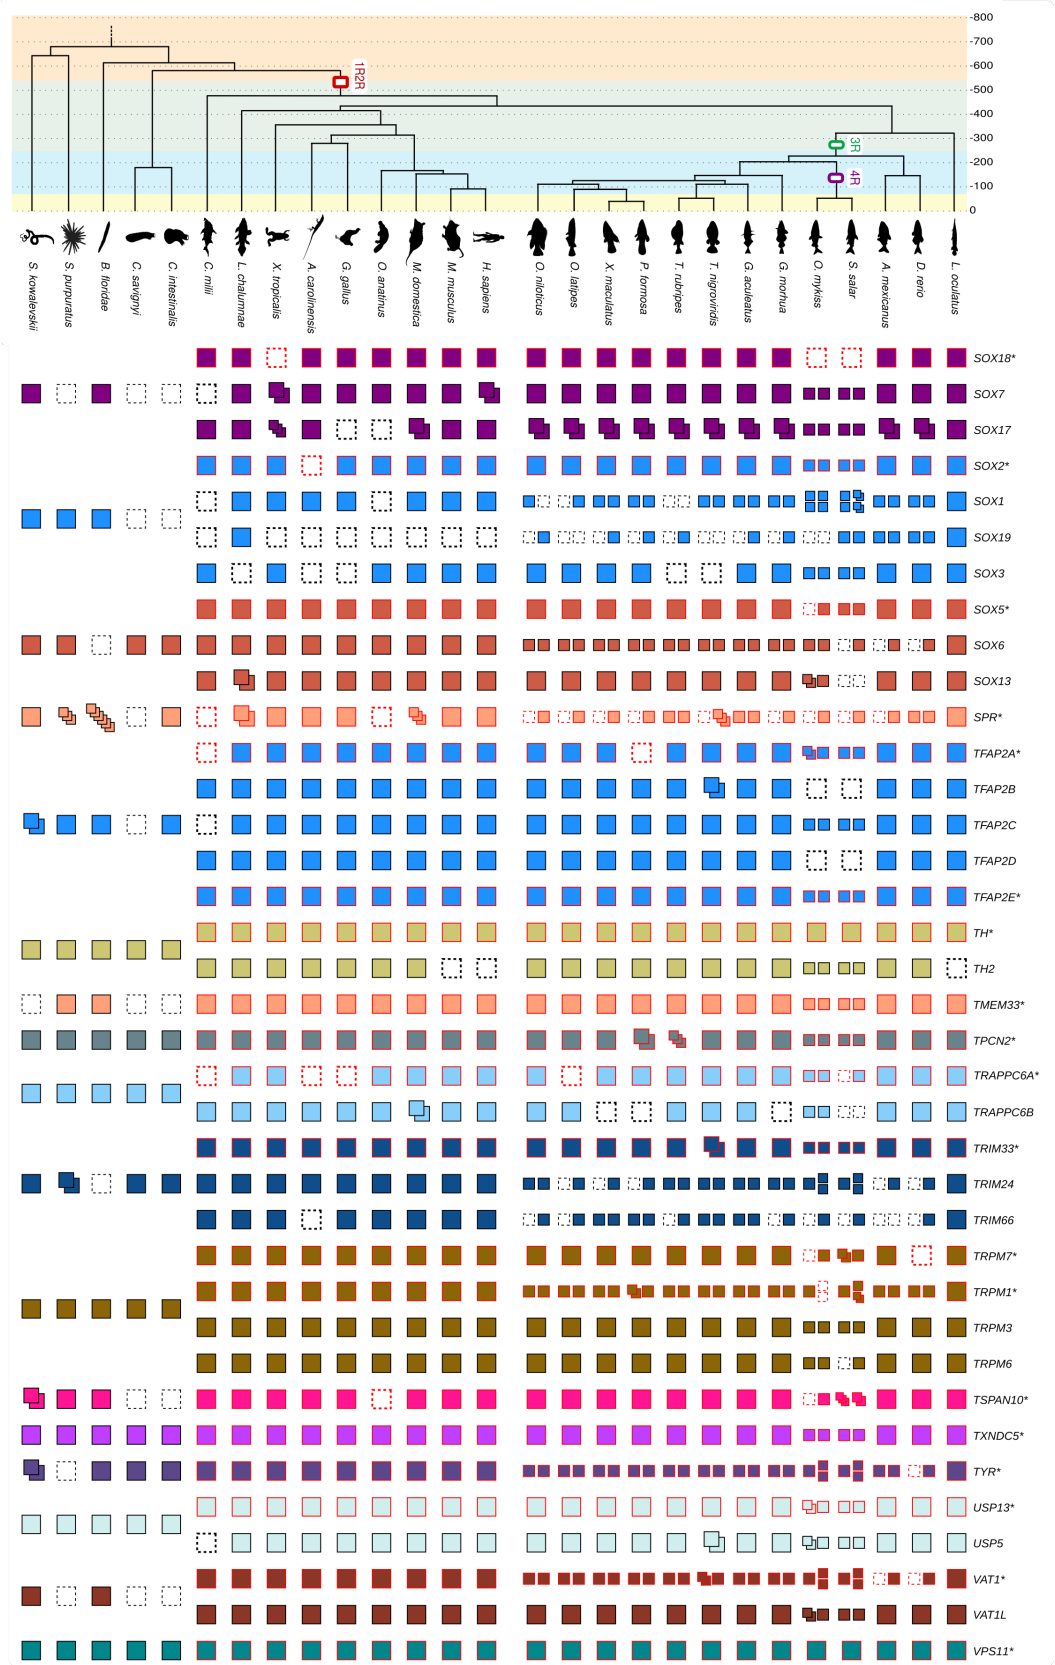

Supplementary figure 4J

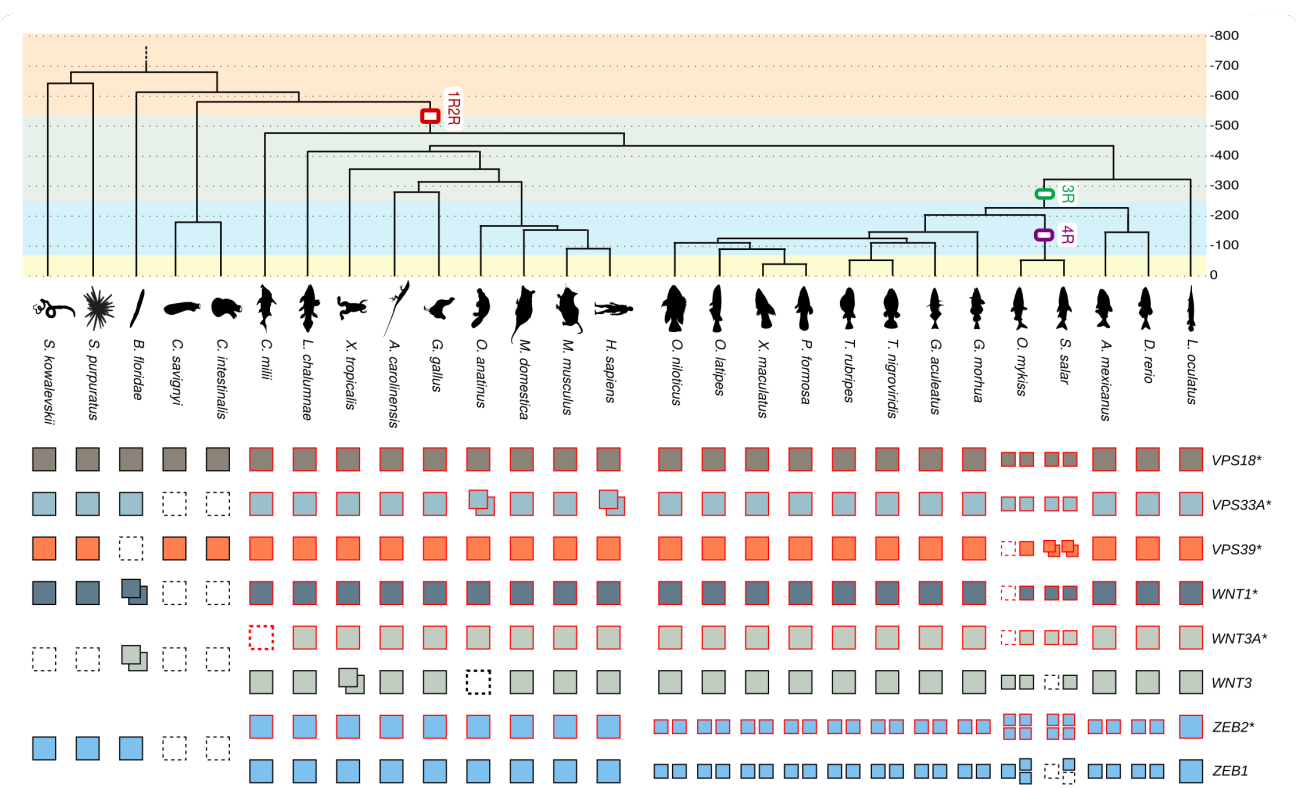

## Real gene family tree

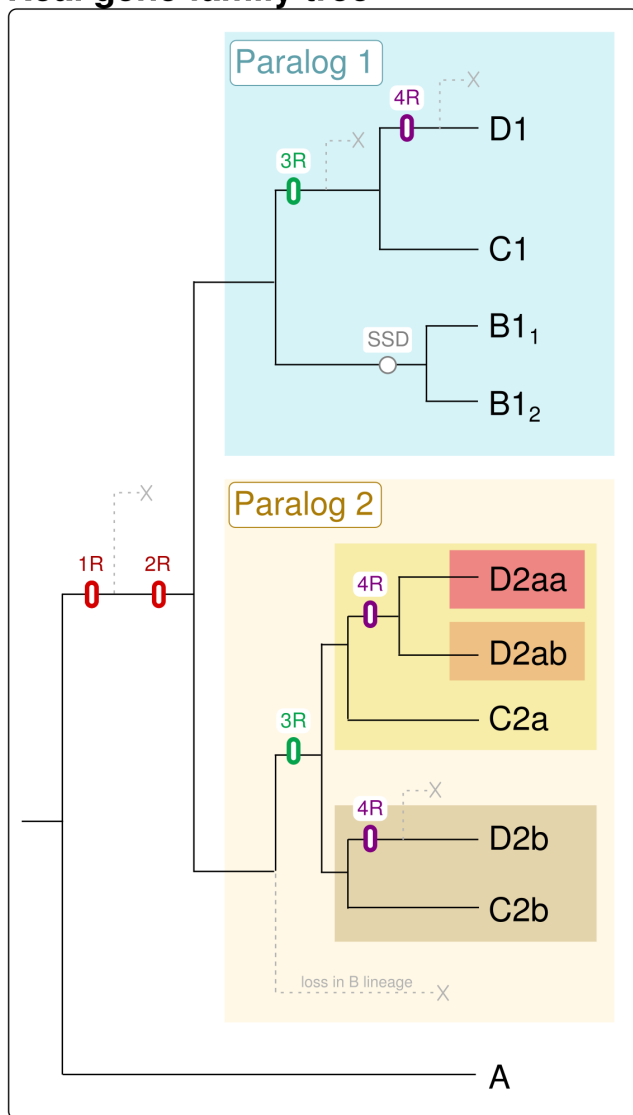

## Summarized tree

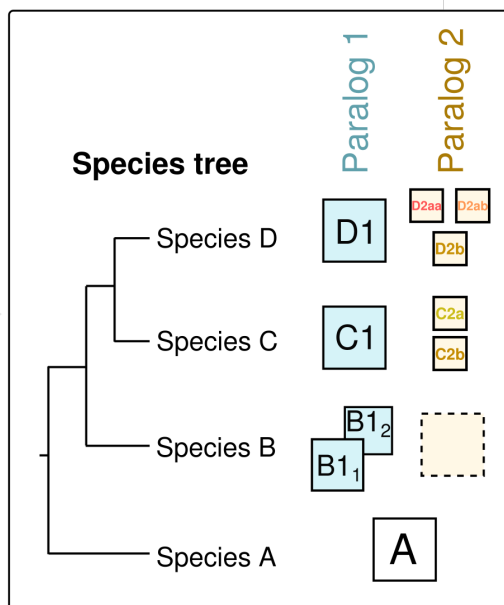

Supplementary figure 5. Graphical illustration of the method used to build the representation of the gene relationships within a family.

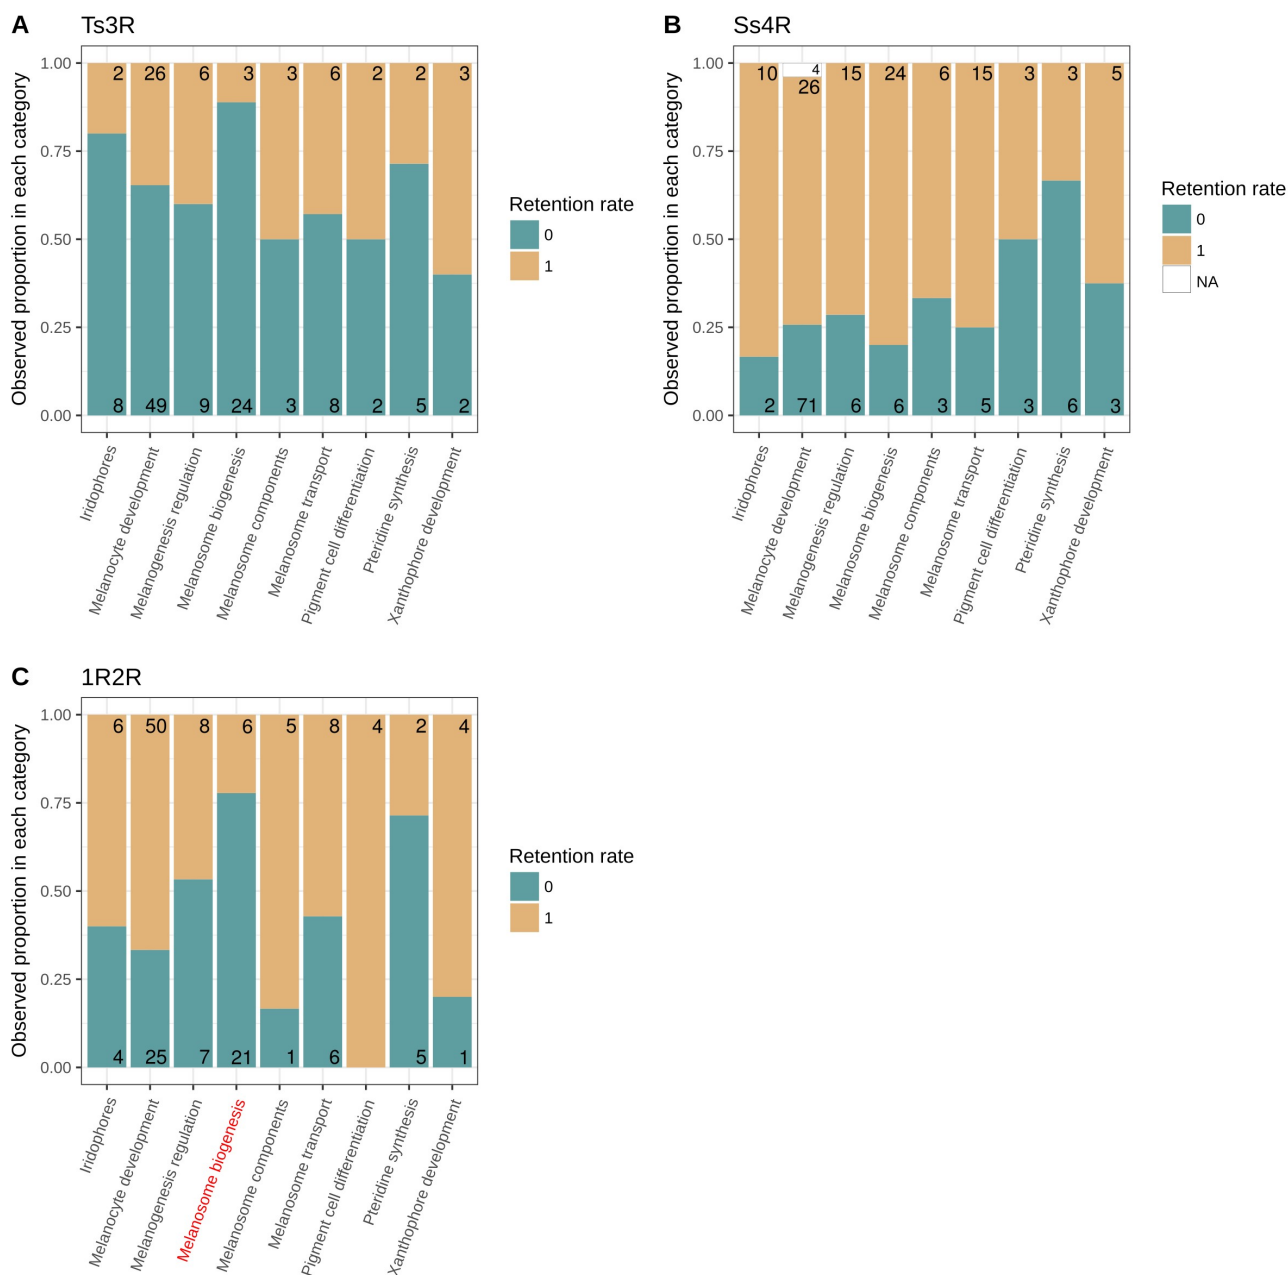

**Supplementary figure 6. Retention rates after Ts3R (A), Ss4R (B) and 1R/2R (C) for each functional category of pigmentation gene (see Fig. 2).** There was no significant group effect after Ts3R and Ss4R (p-value of Wald test = 0.3 and 0.34, respectively). However, we found a group effect after 1R/2R (p-value of Wald test = 0.015). The "melanosome biogenesis" group (in red) was found to be enriched in monogenic PGCFs compared to other groups. Numbers indicate the number of genes in each category.

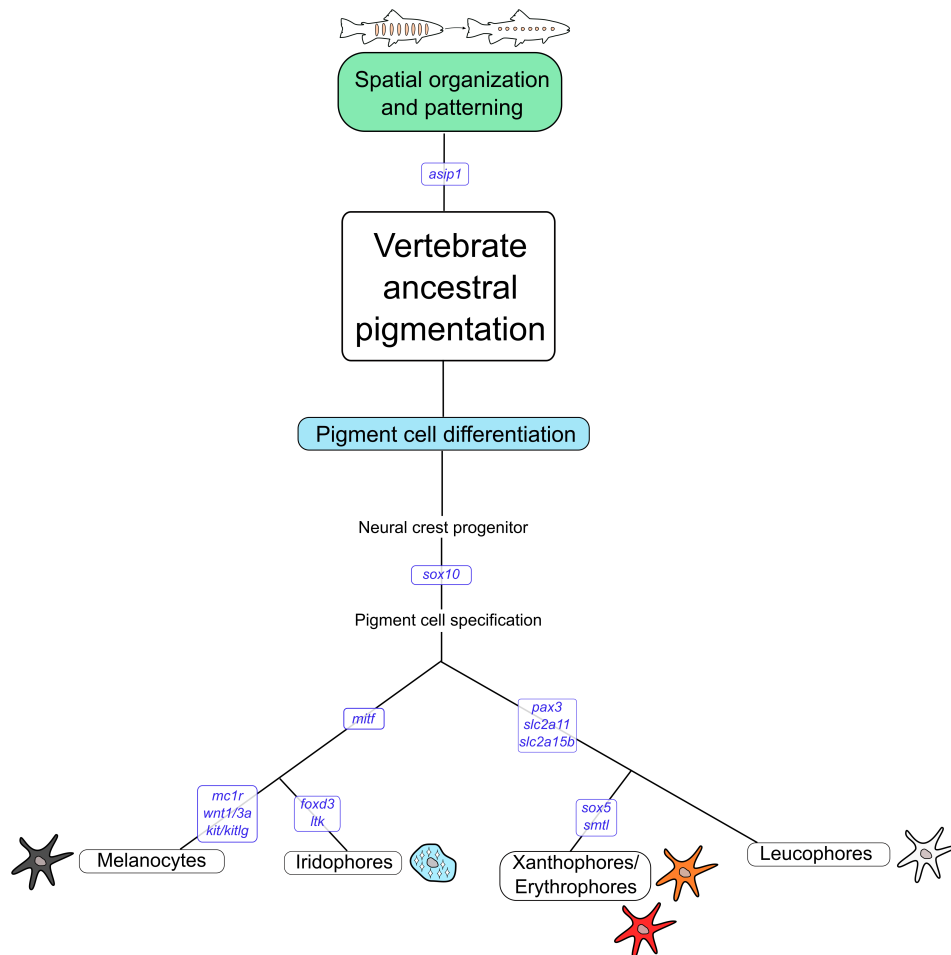

**Supplementary figure 7. A putative ancestral vertebrate pigmentation pathway.** According to the phylogenetical studies performed in this study, genes that are widely conserved among vertebrates are highlighted (blue). Ontogenetic relationships between 4 major pigment cell types in vertebrates are provided based on Kimura (2014). Evidence for positioning of:

***asip1*.** Cal L et al. 2017. BAC Recombineering of the Agouti Loci from Spotted Gar and Zebrafish Reveals the Evolutionary Ancestry of Dorsal-Ventral Pigment Asymmetry in Fish. J. Exp. Zool. Part B Mol. Dev. Evol. doi: 10.1002/jez.b.22748.

***sox10* and *wnt1/wnt3a*.** Rawls JF, Mellgren EM, Johnson SL. 2001. How the Zebrafish Gets Its Stripes. Dev. Biol. 240:301–314. doi: 10.1006/dbio.2001.0418.

***mitf* and *foxd3***. Curran K et al. 2010. Interplay between Foxd3 and Mitf regulates cell fate plasticity in the zebrafish neural crest. *Dev. Biol.* 344:107–118. doi: 10.1016/j.ydbio.2010.04.023.

***kit/kitlg***. Patterson LB, Parichy DM. 2013. Interactions with Iridophores and the Tissue Environment Required for Patterning Melanophores and Xanthophores during Zebrafish Adult Pigment Stripe Formation Barsh, GS, editor. *PLoS Genet.* 9:e1003561. doi: 10.1371/journal.pgen.1003561.

***mclr***. Logan DW, Burn SF, Jackson IJ. 2006. Regulation of pigmentation in zebrafish melanophores. *Pigment Cell Res.* 19:206–213. doi: 10.1111/j.1600-0749.2006.00307.x.

***ltk***. Fadeev A, Krauss J, Singh AP, Nüsslein-Volhard C. 2016. Zebrafish Leucocyte tyrosine kinase controls iridophore establishment, proliferation and survival. *Pigment Cell Melanoma Res.* 29:284–296. doi: 10.1111/pcmr.12454.

***pax3***. Minchin JEN, Hughes SM. 2008. Sequential actions of Pax3 and Pax7 drive xanthophore development in zebrafish neural crest. *Dev. Biol.* 317:508–522. doi: 10.1016/j.ydbio.2008.02.058.

***smtl***. Fukamachi S, Sugimoto M, Mitani H, Shima A. 2004. Somatolactin selectively regulates proliferation and morphogenesis of neural-crest derived pigment cells in medaka. *Proc. Natl. Acad. Sci.* 101:10661–10666. doi: 10.1073/pnas.0401278101.

***slc2a11/slc2a15***. Kimura T et al. 2014. Leucophores are similar to xanthophores in their specification and differentiation processes in medaka. *Proc. Natl. Acad. Sci.* 111:7343–7348. doi: 10.1073/pnas.1311254111.

***sox5***. Nagao Y et al. 2014. Sox5 Functions as a Fate Switch in Medaka Pigment Cell Development. *PLoS Genet.* 10. doi: 10.1371/journal.pgen.1004246.

**Supplementary table 1:** List of all pigmentation genes (PGs) considered in this study. For each PG, its known function(s) and the linked reference are documented. The gene list under the Gene Ontology term “pigmentation” (GO:0043473) parsed for vertebrates (taxon ID: 7742) was manually verified.

**Supplementary table 2:** Best-fitting tree model for each sequence alignment (Bayesian Information Criterion).

**Supplementary table 3:** Gene pairs for which both pigmentation genes (PGs) belong to the same pigmentation gene-containing family, and the function of each paralogue. For some families such as *kit/csf1r* or *ece1/ece2* there is evidence for a specialization of each 1R/2R-ohnolog in a different pigmentation function.

**Supplementary table 4.** Gene Ontology terms enrichment for:

- A. all genes in multigenic PGCFs.
- B. all PGs in monogenic PGCFs.

In all cases, “pigmentation” is the most significant BP term, as expected. Results correspond to the GO terms collapsed at a high hierarchical level. BP: Biological Process; CC: Cellular Component; MF: Molecular Function. ‘P-values’ refer to the Benjamini-Hochberg False Discovery Rate. Only terms for which p-value is below 0.05 are shown. T is the number of term genes, Q the number of query genes, Q&T the number of common genes between term and query.
